# Supplementary material for: An Assessment of the Molecular Diversity of Ticks and Tick-Borne Microorganisms of Small Ruminants in Pakistan
Source: PubMed Central journal article supplement (PMC7563897; doi:10.3390/microorganisms8091428), 2020-09-17
Supplement: microorganisms-08-01428-s001.pdf [file microorganisms-08-01428-s001.pdf]

Table S1

PCR primers and thermocycling conditions used in this study.

| Target region         | Primers                                                                                                   | PCR conditions                                                                                                                                                         | Amplicon size<br>(base pairs) | Reference |
|-----------------------|-----------------------------------------------------------------------------------------------------------|------------------------------------------------------------------------------------------------------------------------------------------------------------------------|-------------------------------|-----------|
| 16S for ticks         | Forward: 16S+1 (5'-CTGCTCAATGATTTTTTAAATTGCTGTGG-3')<br>Reverse: 16S-1 (5'-CCGGTCTGAACTCAGATCAAGT-3')     | Initial denaturation: 95 °C, 4min<br>35 cycles of<br>Denaturation: 95 °C, 1min<br>Annealing: 50 °C, 1min<br>Extension: 68 °C, 1min<br>Final extension: 68 °C, 10min    | 460                           | [25]      |
| cox1 for ticks        | Forward: LCO1490 (5'-GGTCAACAAATCATAAAGATATTGG-3')<br>Reverse: HCO2198 (5'-TAAACTTCAGGGTGACCAAAAAATCA-3') | Initial denaturation: 95 °C, 5min<br>40 cycles of<br>Denaturation: 95 °C, 45sec<br>Annealing 50 °C, 45sec<br>Extension: 72 °C, 1min<br>Final extension: 72 °C, 5min    | 710                           | [40]      |
| ITS-2 for ticks       | Forward: RIB-8 (5'-GTCGTAGTCCGCCGTC-3')<br>Reverse: RIB-11 (5'-GAGTACGACGCCCTACC-3')                      | Initial denaturation: 94 °C, 5min<br>35 cycles of<br>Denaturation: 94 °C, 30sec<br>Annealing: 62 °C, 15sec<br>Extension: 72 °C, 15sec<br>Final extension: 72 °C, 5min  | 280                           | [41]      |
| 18S for<br>piroplasms | Forward: (5'-GAGGTAGTGACAAGAAATAACAATA-3')<br>Reverse: (5'-TCTTCGATCCCCTAACTTTC-3')                       | Initial denaturation: 95 °C, 5min<br>35 cycles of<br>Denaturation: 95 °C, 30sec<br>Annealing: 57 °C, 20 sec<br>Extension: 72 °C, 1 min<br>Final extension: 72 °C, 5min | 500                           | [42]      |

Table S2

List of primers and probes used in this study for identification of microorganisms and ticks.

| Species                          | Target       | Name           | Sequence                      | Length<br>(base pair) |
|----------------------------------|--------------|----------------|-------------------------------|-----------------------|
| <i>Anaplasma marginale</i>       | <i>msp1</i>  | An_ma_msp1_F   | CAGGCTTCAAGCGTACAGTG          | 85                    |
|                                  |              | An_ma_msp1_R   | GATATCTGTGCCTGGCCTTC          |                       |
|                                  |              | An_ma_msp1_P   | ATGAAAGCCTGGAGATGTTAGACCGAG   |                       |
| <i>Anaplasma platys</i>          | <i>groEL</i> | An_pla_groEL_F | TTCTGCCGATCCTTGAAAACG         | 75                    |
|                                  |              | An_pla_groEL_R | CTTCTCCTTCTACATCCTCAG         |                       |
|                                  |              | An_pla_groEL_P | TTGCTAGATCCGGCAGGCCTCTGC      |                       |
| <i>Anaplasma ovis</i>            | <i>msp4</i>  | An_ov_msp4_F   | TCATTGACATGCGTGAGTCA          | 92                    |
|                                  |              | An_ov_msp4_R   | TTTGCTGGCGCACTCACATC          |                       |
|                                  |              | An_ov_msp4_P   | AGCAGAGAGACCTCGTATGTTAGAGGC   |                       |
| <i>Anaplasma centrale</i>        | <i>groEL</i> | An_cen_groEL_F | AGCTGCCCTGCTATACACG           | 79                    |
|                                  |              | An_cen_groEL_R | GATGTTGATGCCCAATTGCTC         |                       |
|                                  |              | An_cen_groEL_P | CTTGCATCTCTAGACGAGGTAAAGGGG   |                       |
| <i>Anaplasma phagocytophilum</i> | <i>msp2</i>  | An_ph_msp2_F   | GCTATGGAAGGCAGTGTGG           | 77                    |
|                                  |              | An_ph_msp2_R   | GTCTTGAAGCGCTCGTAACC          |                       |
|                                  |              | An_ph_msp2_P   | AATCTCAAGCTCAACCCTGGCACCAC    |                       |
| <i>Anaplasma bovis</i>           | <i>groEL</i> | An_bo_groEL_F  | CTGATAGCTACAGTTAAGCCC         | 73                    |
|                                  |              | An_bo_groEL_R  | AGGTGCTGTTGGATGTACTGCTGGACC   |                       |
|                                  |              | An_bo_groEL_P  | TCATTGACATGCGTGAGTCA          |                       |
| <i>Anaplasma spp.</i>            | 16S rRNA     | Ana_spp_16S_F  | CTTAGGGTTGTAAAACCTTTTCAG      | 160                   |
|                                  |              | Ana_spp_16S_R  | CTTTAACTTACCAAACCGCCTAC       |                       |
|                                  |              | Ana_spp_16S_P  | ATGCCCTTTACGCCCAATAATTCCGAACA |                       |
| Apicomplexa                      | 18S rRNA     | Apic_18S_F     | TGAACGAGGAATGCCTAGTATG        | 104                   |
|                                  |              | Apic_18S_R     | CACCGGATCACTCGATCGG           |                       |
|                                  |              | Apic_18S_S     | TAGGAGCGACGGGCGGTGTGTAC       |                       |
| <i>Babesia divergens</i>         | <i>hsp70</i> | Bab_di_hsp70_F | CTCATTTGGTGACGCCGCTA          | 83                    |
|                                  |              | Bab_di_hsp70_R | CTCCTCCCGATAAGCCTCTT          |                       |
|                                  |              | Bab_di_hsp70_P | AGAACCAGGAGGCCCGTAACCCAGA     |                       |

|                                           |               |                                                       |                                                                                                  |     |
|-------------------------------------------|---------------|-------------------------------------------------------|--------------------------------------------------------------------------------------------------|-----|
| <i>Babesia caballi</i>                    | <i>Rap1</i>   | Ba_cab_rap1_F<br>Ba_cab_rap1_R<br>Ba_cab_rap1_P       | GTTGTTCGGCTGGGGCATC<br>CAGGCGACTGACGCTGTGT<br>TCTGTCCCGATGTCAAGGGGCAGGT                          | 94  |
| <i>Babesia canis</i>                      | 18S rRNA      | Ba_ca_RNA18S_F<br>Ba_ca_RNA18S_R<br>Ba_ca_RNA18S_P    | TGGCCGTTCTTAGTTGGTGG<br>AGAAGCAACCGAAACTCAAATA<br>ACCGGCACTAGTTAGCAGGTTAAGGTC                    | 104 |
| <i>Babesia microti</i>                    | <i>CCTeta</i> | Bab_mi_CCTeta_F<br>Bab_mi_CCTeta_R<br>Bab_mi_CCTeta_P | ACAATGGATTTTCCCAGCAAAA<br>GCGACATTTCCGGCAACTTATATA<br>TACTCTGGTGCAATGAGCGTATGGGTA                | 145 |
| <i>Babesia bovis</i>                      | <i>CCTeta</i> | Ba_bo_CCTeta_F<br>Ba_bo_CCTeta_R<br>Ba_bo_CCTeta_P    | GCCAAGTAGTGGTAGACTGTA<br>GCTCCGTCATTGGTTATGGTA<br>TAAAGACAACACTGGGTCCGCGTGG                      | 100 |
| <i>Babesia bigemina</i>                   | 18S rRNA      | Ba_big_RNA18S_F<br>Ba_big_RNA18S_R<br>Ba_big_RNA18S_P | ATTCCGTTAACGAACGAGACC<br>TTCCCCACGCTTGAAGCA<br>CAGGAGTCCCTCTAAGAAGCAAACGAG                       | 99  |
| <i>Babesia ovis</i>                       | 18S rRNA      | Ba_ov_RNA18S_F<br>Ba_ov_RNA18S_R<br>Ba_ov_RNA18S_P    | TCTGTGATGCCCTTAGATGTC<br>GCTGGTTACCCGCGCCTT<br>TCGGAGCGGGGTCAACTCGATGCAT                         | 92  |
| <i>Babesia vulpes</i>                     | COX1          | Bab_vulpes_F<br>Bab_vulpes_R<br>Bab_vulpes_P          | ACT TCC AGT GTT AAC AGC AGC<br>GGA TGT CCG AAG ACC CAG AA<br>CTT CTG CAT GTT GCT GGC TGA TAG GCA | 129 |
| <i>Bartonella henselae</i>                | <i>pap31</i>  | Bar_he_pap31_F<br>Bar_he_pap31_R<br>Bar_he_pap31_P    | CCGCTGATCGCATTATGCCT<br>AGCGATTCTGCATCATCTGCT<br>ATGTTGCTGGTGGTGTTCCTATGCAC                      | 107 |
| <i>Bartonella spp.</i>                    | <i>ssrA</i>   | Bart_spp_ssrA_F<br>Bart_spp_ssrA_R<br>Bart_spp_ssrA_P | CGTTATCGGGCTAAATGAGTAG<br>ACCCCGCTTAAACCTGCGA<br>TTGCAAATGACAACTATGCGGAAGCACGTC                  | 118 |
| <i>Borrelia burgdorferi sensu stricto</i> | <i>rpoB</i>   | Bo_bu_rpoB_F<br>Bo_bu_rpoB_R<br>Bo_bu_rpoB_P          | GCTTACTCACAAAAGGCGTCTT<br>GCACATCTTACTTCAAATCCT<br>AATGCTCTTGGACCAGGAGGACTTTCA                   | 83  |
| <i>Borrelia garinii</i>                   | <i>rpoB</i>   | Bo_ga_rpoB_F<br>Bo_ga_rpoB_R<br>Bo_ga_rpoB_P          | TGGCCGAACCTTACCCACAAAA<br>ACATCTCTTACTTCAAATCCTGC<br>TCTATCTCTTGAAAGTCCCCCTGGTCC                 | 88  |

|                                                     |              |                 |                                        |     |
|-----------------------------------------------------|--------------|-----------------|----------------------------------------|-----|
| <i>Borrelia afzelii</i>                             | <i>fla</i>   | Bo_af_flA_F     | GGAGCAAATCAAGATGAAGCAAT                | 116 |
|                                                     |              | Bo_af_flA_R     | TGAGCACCCCTCTTGAACAGG                  |     |
|                                                     |              | Bo_af_flA_P     | TGCAGCCTGAGCAGCTTGAAGCTCC              |     |
| <i>Borrelia valaisiana</i>                          | <i>ospA</i>  | Bo_va_ospA_F    | ACTCACAAATGACAGATGCTGAA                | 135 |
|                                                     |              | Bo_va_ospA_R    | GCTTGCTTAAAGTAACAGTACCT                |     |
|                                                     |              | Bo_va_ospA_P    | TCCGCCTACAAGATTTCTGGAAGCTT             |     |
| <i>Borrelia miyamotoi</i>                           | <i>glpQ</i>  | B_miya_glpQ_F   | CACGACCCAGAAATTGACACA                  | 94  |
|                                                     |              | B_miya_glpQ_R   | GTGTGAAGTCAGTGGCGTAAT                  |     |
|                                                     |              | B_miya_glpQ_P   | TCGTCCGTTTTCTCTAGCTCGATTGGG            |     |
| <i>Borrelia spielmanii</i>                          | <i>fla</i>   | Bo_spi_flA_F    | ATCTATTTTCTGGTGAGGGAGC                 | 71  |
|                                                     |              | Bo_spi_flA_R    | TCCTTCTGTGAGCACCTTC                    |     |
|                                                     |              | Bo_spi_flA_P    | TTGAACAGGCGCAGTCTGAGCAGCTT             |     |
| <i>Borrelia lusitaniae</i>                          | <i>rpoB</i>  | Bo_lus_rpoB_F   | CGAACTTACTCATAAAAGGCGTC                | 87  |
|                                                     |              | Bo_lus_rpoB_R   | TGGACGTCTCTTACTTCAAATCC                |     |
|                                                     |              | Bo_lus_rpoB_P   | TTAATGCTCTCGGGCCTGGGGGACT              |     |
| <i>Borrelia bissettii</i>                           | <i>rpoB</i>  | Bo_bi_rpoB_F    | GCAACCAGTCAGCTTTACAG                   | 118 |
|                                                     |              | Bo_bi_rpoB_R    | CAAATCCTGCCCTATCCCTTG                  |     |
|                                                     |              | Bo_bi_rpoB_P    | AAAGTCCTCCCGGCCCAAGAGCATTAA            |     |
| <i>Borrelia bavariensis</i>                         | <i>pyrG</i>  | Bo_bavar_pyrG_F | GTC TTT GGT TCA TGT TGG AGC            | 141 |
|                                                     |              | Bo_bavar_pyrG_R | CCC TCA TAT CCT TTG CCT CC             |     |
|                                                     |              | Bo_bavar_pyrG_P | AAA GCC TCC GGG AAC AAT AAT GCC GTC AA |     |
| <i>Borrelia mayonii</i>                             | <i>fla</i>   | Bo_mayo_flA_F   | ACA CAC CAT CAT CAC TTT CAG G          | 173 |
|                                                     |              | Bo_mayo_flA_R   | TTG AGC ACC TTC TTG AAC AGG            |     |
|                                                     |              | Bo_mayo_flA_P   | CGC AAC CTG AGC AGT TTG AGT TCC CT     |     |
| <i>Borrelia</i> spp.                                | 23S rRNA     | Bo_bu_sl_23S_F  | GAGTCTTAAAAGGGCGATTTAGT                | 73  |
|                                                     |              | Bo_bu_sl_23S_R  | CTTCAGCCTGGCCATAAATAG                  |     |
|                                                     |              | Bo_bu_sl_23S_P  | AGATGTGGTAGACCCGAAGCCGAGT              |     |
| <i>Candidatus</i><br><i>Neoehrlichia mikurensis</i> | <i>groEL</i> | Neo_mik_groEL_F | AGAGACATCATTTCGATTTTGGGA               | 96  |
|                                                     |              | Neo_mik_groEL_R | TTCCGGTGTACCATAAAGGCTT                 |     |
|                                                     |              | Neo_mik_groEL_P | AGATGCTGTTGGATGTACTGCTGGACC            |     |
| <i>Coxiella burnetii</i>                            | <i>idc</i>   | Co_bu_idc_F     | AGGCCCGTCCGTTATTTTACG                  | 74  |
|                                                     |              | Co_bu_idc_R     | CGGAAAATCACCATATTCACCTT                |     |
|                                                     |              | Co_bu_idc_P     | TTCAGGCGTTTTGACCGGGCTTGGC              |     |

|                                 |             |                  |                                |     |
|---------------------------------|-------------|------------------|--------------------------------|-----|
|                                 | IS1111      | Co_bu_IS111_F    | TGGAGGAGCGAACCATTGGT           | 86  |
|                                 |             | Co_bu_IS111_R    | CATACGGTTTGACGTGCTGC           |     |
|                                 |             | Co_bu_IS111_P    | ATCGGACGTTTATGGGGATGGGTATCC    |     |
| <i>Ehrlichia canis</i>          | <i>dsb</i>  | Eh_ca_dsb_F      | AATACTTGGTGAGTCTTCACTCA        | 110 |
|                                 |             | Eh_ca_dsb_R      | GTTGCTTGTAATGTAGTGCTGC         |     |
|                                 |             | Eh_ca_dsb_P      | AAGTTGCCCAAGCAGCACTAGCTGTAC    |     |
| <i>Ehrlichia</i> spp.           | 16S rRNA    | Neo_mik_16S_R    | GCAACGCGAAAAACCTTACCA          | 98  |
|                                 |             | Neo_mik_16S_R    | AGCCATGCAGCACCTGTGT            |     |
|                                 |             | Neo_mik_16S_P    | AAGGTCCAGCCAAACTGACTCTTCCG     |     |
| <i>Francisella tularensis</i>   | <i>tul4</i> | Fr_tu_tul4_F     | ACCCACAAGGAAGTGTAAGATTA        | 76  |
|                                 |             | Fr_tu_tul4_R     | GTAATTGGGAAGCTTGTATCATG        |     |
|                                 |             | Fr_tu_tul4_P     | AATGGCAGGCTCCAGAAGGTTCTAAGT    |     |
|                                 | <i>fopA</i> | Fr_tu_fopA_F     | GGCAAATCTAGCAGGTCAAGC          | 91  |
|                                 |             | Fr_tu_fopA_R     | CAACACTTGCTTGAACATTTCTAG       |     |
|                                 |             | Fr_tu_fopA_P     | AACAGGTGCTTGGGATGTGGGTGGTG     |     |
| <i>Hepatozoon</i> spp.          | 18S rRNA    | Hepa_spp_18S_F   | ATTGGCTTACCGTGGCAGTG           | 175 |
|                                 |             | Hepa_spp_18S_R   | AAAGCATTTTAACTGCCTTGTATTG      |     |
|                                 |             | Hepa_spp_18S_S   | ACGGTTAACGGGGGATTAGGGTTTCGAT   |     |
| <i>Rickettsia conorii</i>       | 23S-5S ITS  | Ri_co_ITS_F      | CTCACAAAGTTATCAGGTTAAATAG      | 118 |
|                                 |             | Ri_co_ITS_R      | CGATACTCAGCAAATAATTCTCG        |     |
|                                 |             | Ri_co_ITS_P      | CTGGATATCGTGGCAGGGCTACAGTAT    |     |
| <i>Rickettsia slovaca</i>       | 23S-5S ITS  | Ri_slo_ITS_F     | GTATCTACTCACAAAGTTATCAGG       | 138 |
|                                 |             | Ri_slo_ITS_R     | CTTAACTTTTACTACAATACTCAGC      |     |
|                                 |             | Ri_slo_ITS_P     | TAATTTTCGCTGGATATCGTGGCAGGG    |     |
| <i>Rickettsia massiliae</i>     | 23S-5S ITS  | Ri_ma_ITS_F      | GTTATTGCATCACTAATGTTATACTG     | 128 |
|                                 |             | Ri_ma_ITS_R      | GTTAATGTTGTTGCACGACTCAA        |     |
|                                 |             | Ri_ma_ITS_P      | TAGCCCCGCCACGATATCTAGCAAAAA    |     |
| <i>Rickettsia helvetica</i>     | 23S-5S ITS  | Ri_he_ITS_F      | AGAACCGTAGCGTACACTTAG          | 79  |
|                                 |             | Ri_he_ITS_R      | GAAAACCCTACTTCTAGGGGT          |     |
|                                 |             | Ri_he_ITS_P      | TACGTGAGGATTTGAGTACCGGATCGA    |     |
| <i>Rickettsia felis</i>         | <i>orfB</i> | Ri_fel_orfB_F    | ACCCTTTTCGTAACGCTTTGC          | 163 |
|                                 |             | Ri_fel_orfB_R    | TATACTTAATGCTGGGCTAAACC        |     |
|                                 |             | Ri_fel_orfB_P    | AGGGAAACCTGGACTCCATATTCAAAAGAG |     |
| <i>Rickettsia aeschlimannii</i> | ITS         | Rick_aesch_ITS_F | CTCACAAAGTTATCAGGTTAAATAG      | 134 |

|                                               |          |                  |                                |     |
|-----------------------------------------------|----------|------------------|--------------------------------|-----|
| <i>Rickettsia</i> spp.                        | gltA     | Rick_aesch_ITS_R | CTTAAC TTTTACTACGATACTTAGCA    | 78  |
|                                               |          | Rick_aesch_ITS_P | TAATTTTTGCTGGATATCGTGGCGGGG    |     |
|                                               |          | Rick_spp_gltA_F  | GTCGCAAATGTTACGGTACTT          |     |
|                                               |          | Rick_spp_gltA_R  | TCTTCGTGCATTTCCTTCCATTG        |     |
| <i>Theileria</i> spp.                         | 18S rRNA | Rick_spp_gltA_P  | TGCAATAGCAAGAACCGTAGGCTGGAT    | 126 |
|                                               |          | Th_an_18S_F      | GCGGTAATTCCAGCTCCAATA          |     |
|                                               |          | Th_an_18S_R      | AAACTCCGTCCGAAAAAAGCC          |     |
|                                               |          | Th_an_18S_P      | ACATGCACAGACCCCAGAGGGACAC      |     |
| <i>Escherichia coli</i>                       | eae      | eae-F2           | CATTGATCAGGATTTTTCTGGTGATA     | 102 |
|                                               |          | eae-R            | CTCATGCGGAAATAGCCGTTA          |     |
|                                               |          | eae-P            | ATAGTCTCGCCAGTATTCGCCACCAATACC |     |
|                                               |          |                  |                                |     |
| <i>Rhipicephalus sanguineus</i><br>sensu lato | ITS-2    | Rhi_san_ITS2_F   | TTGAACGCTACGGCAAAGCG           | 110 |
|                                               |          | Rhi_san_ITS2_R   | CCATCACCTCGGTGCAGTC            |     |
|                                               |          | Rhi_san_ITS2_P   | ACAAGGGCCGCTCGAAAGGCGAGA       |     |
| Tick spp.                                     | 16S rRNA | Tick_spp_16S_F   | AAATACTCTAGGGATAACAGCGT        | 99  |
|                                               |          | Tick_spp_16S_R   | TCTTCATCAAACAAGTATCCTAATC      |     |
|                                               |          | Tick_spp_16S_P   | CAACATCGAGGTCGCAAACCATTTTGTCTA |     |
|                                               |          |                  |                                |     |

Table S3

Pairwise comparison of 16S nucleotide sequences (aligned over 429 bp) of ticks determined herein. Nucleotide similarity and percentage differences are given above and below the diagonal, respectively.

| Tick species                   | Sequence ID (GenBank accession no.) | 191  | 187   | 290   | 355   | 192   | 30    | 116   | 302   | 357   | 298   | 7     | 225   |
|--------------------------------|-------------------------------------|------|-------|-------|-------|-------|-------|-------|-------|-------|-------|-------|-------|
| <i>Haemaphysalis punctata</i>  | 191 (MT799944)                      | -    | 0.884 | 0.882 | 0.884 | 0.887 | 0.818 | 0.829 | 0.829 | 0.831 | 0.801 | 0.801 | 0.806 |
| <i>Hs. sulcata</i>             | 187 (MT799946)                      | 11.6 | -     | 0.985 | 0.988 | 0.99  | 0.818 | 0.828 | 0.828 | 0.83  | 0.819 | 0.822 | 0.826 |
| <i>Hs. sulcata</i>             | 290 (MT799948)                      | 11.8 | 1.5   | -     | 0.992 | 0.995 | 0.811 | 0.823 | 0.823 | 0.826 | 0.814 | 0.81  | 0.814 |
| <i>Hs. sulcata</i>             | 355 (MT799949)                      | 11.6 | 1.2   | 0.8   | -     | 0.997 | 0.813 | 0.826 | 0.826 | 0.828 | 0.817 | 0.812 | 0.817 |
| <i>Hs. sulcata</i>             | 192 (MT799947)                      | 11.3 | 1     | 0.5   | 0.3   | -     | 0.816 | 0.828 | 0.828 | 0.83  | 0.819 | 0.814 | 0.819 |
| <i>Hyalomma anatolicum</i>     | 30 (MT799950)                       | 18.2 | 18.2  | 18.9  | 18.7  | 18.4  | -     | 0.861 | 0.861 | 0.863 | 0.847 | 0.849 | 0.852 |
| <i>Rhipicephalus microplus</i> | 116 (MT799951)                      | 17.1 | 17.2  | 17.7  | 17.4  | 17.2  | 13.9  | -     | 0.995 | 0.997 | 0.901 | 0.884 | 0.887 |
| <i>Rh. microplus</i>           | 302 (MT799952)                      | 17.1 | 17.2  | 17.7  | 17.4  | 17.2  | 13.9  | 0.5   | -     | 0.997 | 0.898 | 0.882 | 0.884 |
| <i>Rh. microplus</i>           | 357 (MT799953)                      | 16.9 | 17    | 17.4  | 17.2  | 17    | 13.7  | 0.3   | 0.3   | -     | 0.901 | 0.884 | 0.887 |
| <i>Rh. haemaphysaloides</i>    | 298 (MT799956)                      | 19.9 | 18.1  | 18.6  | 18.3  | 18.1  | 15.3  | 9.9   | 10.2  | 9.9   | -     | 0.931 | 0.933 |
| <i>Rh. turanicus</i>           | 7 (MT799954)                        | 19.9 | 17.8  | 19    | 18.8  | 18.6  | 15.1  | 11.6  | 11.8  | 11.6  | 6.9   | -     | 0.992 |
| <i>Rh. turanicus</i>           | 225 (MT799955)                      | 19.4 | 17.4  | 18.6  | 18.3  | 18.1  | 14.8  | 11.3  | 11.6  | 11.3  | 6.7   | 0.8   | -     |

Table S4

Pairwise comparison of *cox1* nucleotide sequences (aligned over 673 bp) of ticks determined herein. Nucleotide similarity and percentage differences are given above and below the diagonal, respectively.

| Tick species                       | Sequence ID<br>(GenBank<br>accession no.) | 30   | 116   | 302   | 7     | 225   | 18    | 298   | 230   | 340   | 191   | 187   | 192   | 355   |
|------------------------------------|-------------------------------------------|------|-------|-------|-------|-------|-------|-------|-------|-------|-------|-------|-------|-------|
| <i>Hyalomma anatolicum</i>         | 30 (MT80311)                              | -    | 0.823 | 0.821 | 0.815 | 0.826 | 0.82  | 0.82  | 0.824 | 0.826 | 0.802 | 0.808 | 0.806 | 0.811 |
| <i>Rhipicephalus<br/>microplus</i> | 116 (MT800322)                            | 17.7 |       | 0.998 | 0.861 | 0.87  | 0.864 | 0.86  | 0.855 | 0.857 | 0.817 | 0.818 | 0.817 | 0.82  |
| <i>Rh. microplus</i>               | 302 (MT800323)                            | 17.9 | 0.2   | -     | 0.86  | 0.869 | 0.863 | 0.858 | 0.854 | 0.855 | 0.818 | 0.82  | 0.818 | 0.821 |
| <i>Rh. turanicus</i>               | 7 (MT800312)                              | 18.5 | 13.9  | 14    | -     | 0.982 | 0.986 | 0.893 | 0.878 | 0.879 | 0.829 | 0.823 | 0.818 | 0.818 |
| <i>Rh. turanicus</i>               | 225 (MT800313)                            | 17.4 | 13    | 13.1  | 1.8   | -     | 0.992 | 0.895 | 0.887 | 0.888 | 0.841 | 0.83  | 0.829 | 0.826 |
| <i>Rh. turanicus</i>               | 18 (MT800314)                             | 18   | 13.6  | 13.7  | 1.4   | 0.8   | -     | 0.888 | 0.879 | 0.881 | 0.835 | 0.824 | 0.823 | 0.82  |
| <i>Rh. haemaphysaloides</i>        | 298 (MT800315)                            | 18   | 14    | 14.2  | 10.7  | 10.5  | 11.2  | -     | 0.924 | 0.925 | 0.827 | 0.833 | 0.833 | 0.832 |
| <i>Rh. haemaphysaloides</i>        | 230 (MT800316)                            | 17.6 | 14.5  | 14.6  | 12.2  | 11.3  | 12.1  | 7.6   | -     | 0.998 | 0.835 | 0.827 | 0.827 | 0.829 |
| <i>Rh. haemaphysaloides</i>        | 340 (MT800317)                            | 17.4 | 14.3  | 14.5  | 12.1  | 11.2  | 11.9  | 7.5   | 0.2   | -     | 0.836 | 0.829 | 0.829 | 0.83  |
| <i>Haemaphysalis<br/>punctata</i>  | 191 (MT800318)                            | 19.8 | 18.3  | 18.2  | 17.1  | 15.9  | 16.5  | 17.3  | 16.5  | 16.4  | -     | 0.851 | 0.848 | 0.848 |
| <i>Hs. sulcata</i>                 | 187 (MT800319)                            | 19.2 | 18.2  | 18    | 17.7  | 17    | 17.6  | 16.7  | 17.3  | 17.1  | 14.9  | -     | 0.989 | 0.988 |
| <i>Hs. sulcata</i>                 | 192 (MT800320)                            | 19.4 | 18.3  | 18.2  | 18.2  | 17.1  | 17.7  | 16.7  | 17.3  | 17.1  | 15.2  | 1.1   | -     | 0.992 |
| <i>Hs. sulcata</i>                 | 355 (MT800321)                            | 18.9 | 18    | 17.9  | 18.2  | 17.4  | 18    | 16.8  | 17.1  | 17    | 15.2  | 1.2   | 0.8   | -     |



Table S5

Pairwise comparison of ITS-2 nucleotide sequences (aligned over 273 bp) of ticks belonging to *Rhipicephalus* and *Hyalomma* genera determined herein. Nucleotide similarity and percentage differences are given above and below the diagonal, respectively.

| Tick species                   | Sequence ID (GenBank accession no.) | 7    | 298   | 302   | 30    |
|--------------------------------|-------------------------------------|------|-------|-------|-------|
| <i>Rhipicephalus turanicus</i> | 7 (MT818226)                        | -    | 0.972 | 0.913 | 0.734 |
| <i>Rh. haemaphysaloides</i>    | 298 (MT818227)                      | 2.8  | -     | 9.8   | 0.752 |
| <i>Rh. microplus</i>           | 302 (MT818223)                      | 8.7  | 0.902 | -     | 0.72  |
| <i>Hyalomma anatolicum</i>     | 30 (MT818222)                       | 26.6 | 24.8  | 28    | -     |
